# Supplementary material
Source: PubMed Central journal article supplement (PMC5395286)
Supplement: NIHMS848182-supplement-2.pdf [file NIHMS848182-supplement-2.pdf]

## SUPPLEMENTAL INFORMATION

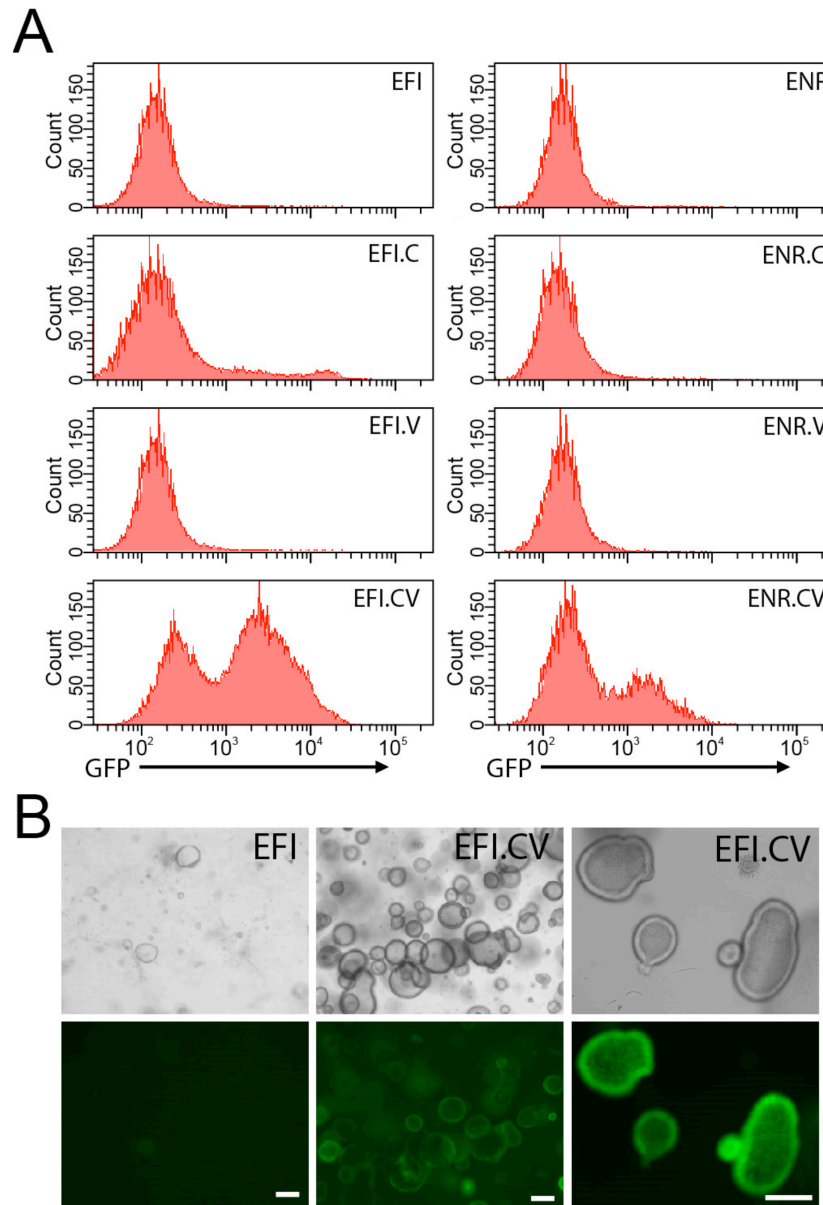

### Supplemental Figure 1. Related to Figure 2. Wnt Activation Combined with HDAC Inhibition Increased the Number of Inner Ear Lgr5+ Cells in Culture

A) FACS histograms showing GFP expression of isolated single Lgr5-GFP inner ear progenitor cells cultured for 7 days under multiple conditions. E: EGF. F: bFGF. I: IGF1. W: Wnt3a. R: R-Spondin 1. C: CHIR99021. V: VPA. N: Noggin. n>3 experiments.

B) GFP fluorescence and bright-field images of Lgr5-GFP inner ear progenitor cells cultured with or without CHIR and VPA. Scale bars: 100  $\mu\text{m}$ . n>3 experiments.

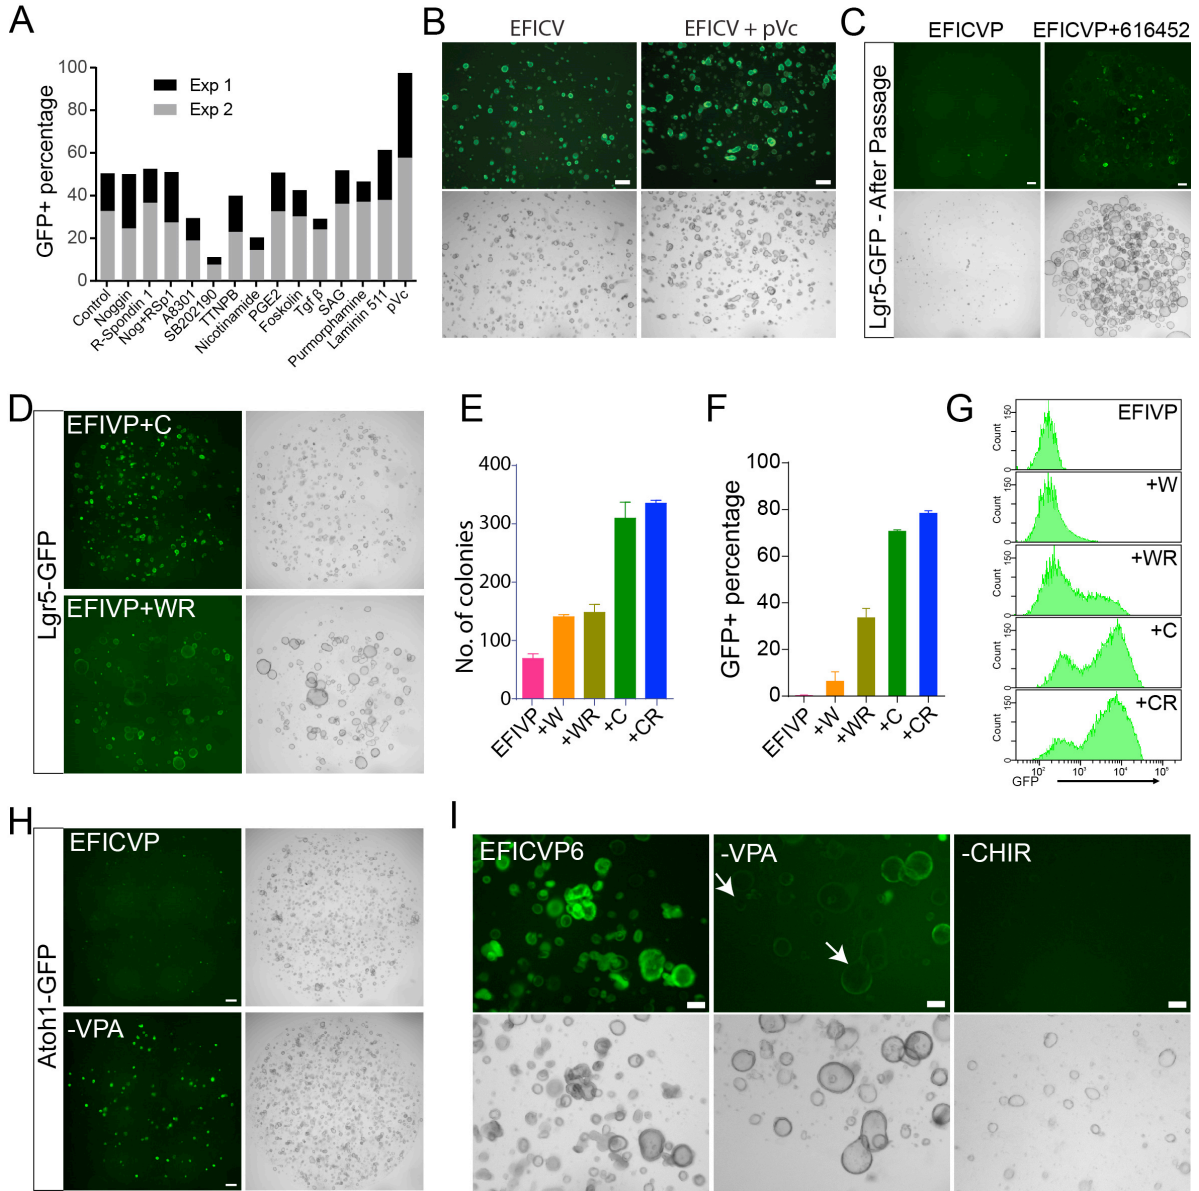

**Supplemental Figure 2. Related to Figure 2. Small Molecules Increased the Number and Purity of Lgr5+ Cells and Enabled Passaging**

A) Screen for supportive factors for inner ear progenitor cells. The percentage of Lgr5-GFP inner ear progenitor cells cultured in multiple conditions is shown. Small molecules were added based on the control (EFICV) condition. The percentage of Lgr5-GFP cells is shown. Laminin was added to Matrigel. Two batches of cells were used for screening as shown as Exp 1 and Exp 2.

B) GFP fluorescence and bright-field images of Lgr5-GFP inner ear progenitor cells cultured for 7 days in EFICV, with or without the addition of 2-phospho-L-ascorbic acid (pVc, P). Scale bars: 400  $\mu$ m.

C) Fluorescence and bright-field images of Lgr5-GFP cells at day 10 of passage 2 in EFICVP, with or without the addition of 616452. The addition of 616452 permitted the passage of cultured Lgr5-GFP cells. Scale bars: 400  $\mu$ m.

D) Lgr5-GFP expression of inner ear progenitor cells cultured for 7 days with Wnt pathway activators. EFIVP was added in all conditions. W: Wnt3a. R: R-Spondin 1. C: CHIR99021.

E, F, G) Number of colonies (E), percentage of Lgr5-GFP cells (F), and FACS histogram (G) of cultures obtained with equal numbers of Lgr5-GFP cells after 7 days. EFIVP was added in all conditions. W, Wnt3a, R, R-Spondin 1. C: CHIR99021. n=2 duplicated wells.

H) GFP fluorescence and bright-field images of progenitor cells isolated from Atoh1-nGFP+ mice and cultured for 7 days in EFICVP with or without VPA. Scale bars: 400  $\mu$ m.

I) GFP fluorescence and bright-field images of Lgr5-GFP inner ear progenitor cells cultured for 10 days in the indicated conditions. Arrows indicate colonies with diminished Lgr5-GFP expression. Scale bars: 200  $\mu$ m.



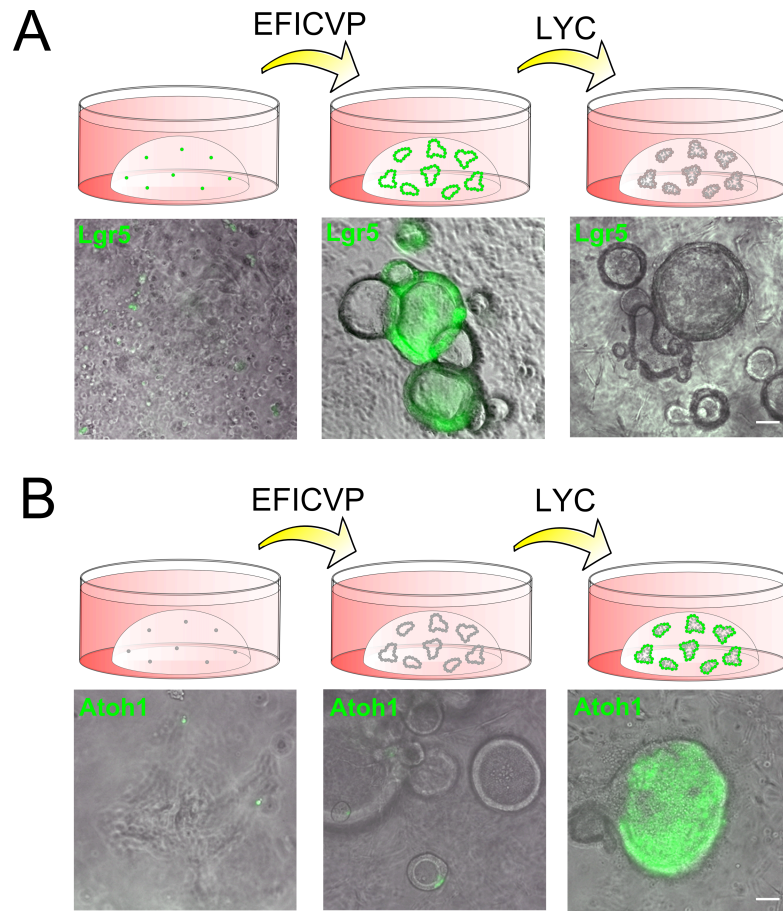

**Supplemental Figure 3. Related to Figure 4. Wnt and Notch Pathway Manipulation Promoted the Proliferation of Supporting Cells and their Conversion into Hair Cells**

A) Cultures were subjected to expansion for ~10 days (EFICVP), followed by differentiation for ~10 days (LYC). The expansion protocol resulted in large increases in Lgr5+ cells. Lgr5 expression was halted by the differentiation protocol. n = 24. Scale bar: 50  $\mu$ m.

B) Atoh1-nGFP+ cells did not proliferate during expansion but were obtained after the treatment used for differentiation. n = 24. Scale bar: 50  $\mu$ m.

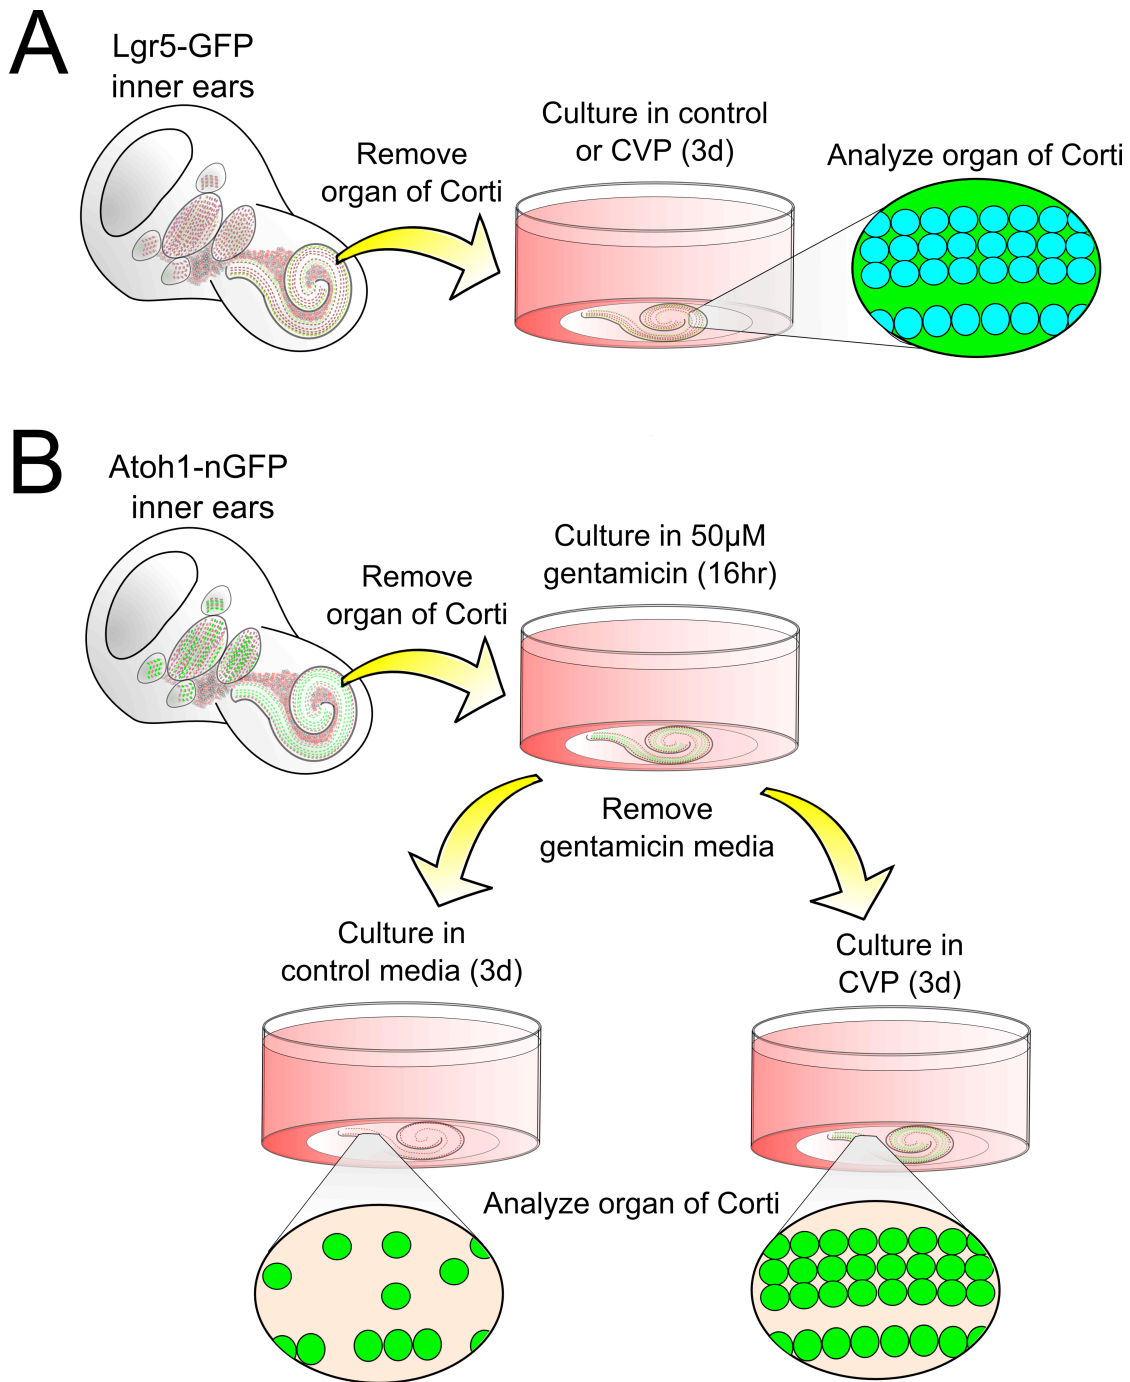

**Supplemental Figure 4. Related to Figure 7. Methods for Cochlear Explant Experiments**

A) Methods used for the treatment of intact cochlear explants.

B) Methods used for the treatment of hair cell-damaged cochlear explants.

**Supplemental Video 1. Related to Figure 5. Progenitor cells treated with CHIR and LY411575**

Confocal scanning after drug treatment shows nearly complete conversion of Lgr5+ cells in the organoid to myosin VIIa+ cells (cyan) with actin-rich protrusions (red).

**Supplemental Table 1. Related to Figures 3-7. Growth Factors and Small Molecules**

| Reagent Name              | Abbreviation | Final concentration | Vendor            |
|---------------------------|--------------|---------------------|-------------------|
| EGF                       | E            | 50 ng/ml            | Life Technologies |
| bFGF                      | F            | 50 ng/ml            | Life Technologies |
| IGF1                      | I            | 50 ng/ml            | Life Technologies |
| CHIR99021                 | CHIR/C       | 3 $\mu$ M           | LC Labs           |
| Valproic Acid Sodium Salt | VPA/V        | 1 mM                | Sigma             |
| 2-phospho-L-ascorbic acid | pVc/P        | 100 $\mu$ g/ml      | Sigma             |
| 616452                    | 6            | 2 $\mu$ M           | Calbiochem        |
| LY411575                  | L            | 5 $\mu$ M           | Sigma             |

**Supplemental Table 2. Related to Figures 3-7. Antibodies**

| Primary antibody | Dilution  | Source                    | Vendor              |
|------------------|-----------|---------------------------|---------------------|
| Myosin VIIa      | 1:500     | Rabbit Polyclonal         | Proteus Biosciences |
| Sox2             | 1:300     | Goat polyclonal           | Santa Cruz          |
| vGlut3           | 1:1000    | Guinea Pig polyclonal     | Chemicon            |
| Prestin          | 1:400     | Goat Polyclonal           | Santa Cruz          |
| Phalloidin       | 1:100     | Fluorescent labeled toxin | Invitrogen          |
| CtBP2            | 1:100     | Mouse monoclonal          | BD Biosciences      |
| FM1-43FX         | 5 $\mu$ M | Fluorescent dye           | Life Technologies   |

**Supplemental Table 3. Related to Figure 5. Primers**

| Gene        | Forward primer          | Reverse primer         |
|-------------|-------------------------|------------------------|
| Myo7a       | GGAGGCCATCCAACATAAGA    | CGGAAGACTTGAGCAGCAG    |
| Lgr5        | TCTCCTACATCGCCTCTGCT    | GCACTTTGAGGCTGTGAAGG   |
| Cdh23       | ATCATCACGGACATGCAAGA    | TCCCTTATCCTGGTCCACAG   |
| Pcdh15      | CCCAGGACTGCAGAACTCAC    | TCGTCTAGTATTTTCGATGTGC |
| Myo1c       | TGGAGAAGTTGGAGGACACTG   | TGTAGGTCACCTCTCCAGCA   |
| Tmc1        | CTGTCCCACCCTGTTTGACT    | TCACGAAACATGCTCTGAGG   |
| Cav1.3      | AAGGGCTACCTGGACTGGAT    | CCACACACCACAAAGCAATC   |
| Ribeye      | GCACCTCTTGGAGACAGCA     | CTACCCAGCTTGTGAAGGA    |
| Prestin     | ACAGTGTGGATGTCGTTGGA    | CAGGTTGACGATCACAATGG   |
| Oncomodulin | TTCTGAGCGCTGATGACATT    | TGGCAGACATCTTGGAGAGG   |
| vGlut3      | TGGACCTTCTATTTGCTCCTG   | GCACCACGATTGTCATCACC   |
| Chrna9      | GGAACCAGGTGGACATATTCAAT | GCAGCCGTAGGAGATGACG    |
